# Supplementary material for: Vacuum heat treated titanate nanotubes for visible-light photocatalysis
Source: Royal Society of Chemistry journal article supplement (doi:10.1039/c4nj01737d), 2014-11-27

## Supporting Information

*for New Journal of Chemistry*

### Vacuum Heat Treated Titanate Nanotubes for Visible-Light Photocatalysis

*Panpan Sun<sup>a\*</sup>, Yongan Wei<sup>b</sup>, Changhua Wang<sup>b</sup>, Xintong Zhang<sup>b\*</sup>*

Fig. S1. Acetaldehyde degradation and CO<sub>2</sub> generation curves of NT-400°C sample for 160min under visible light irradiation.

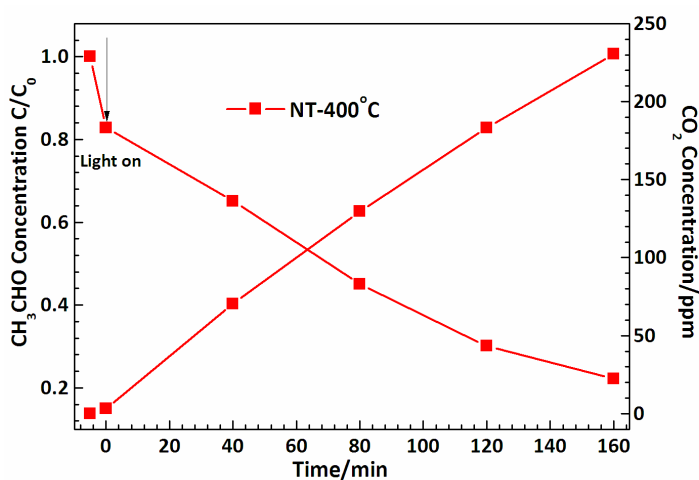

Fig. S2. Cycling test curves of NT-400°C sample in acetaldehyde degradation under visible light irradiation. The reaction time for each cycle is 45min.

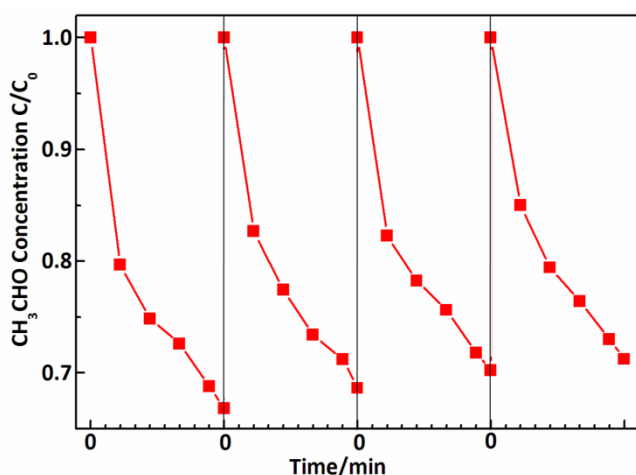

Supplement: c4nj01737d1.pdf [file c4nj01737d1.pdf]
